# Supplementary material
Source: PubMed Central journal article supplement (PMC5736502)
Supplement: NIHMS917321-supplement-001809_-_Supplemental_material.pdf [file NIHMS917321-supplement-001809_-_Supplemental_material.pdf]

## **SUPPLEMENTAL MATERIAL**

### **Supplemental Methods**

#### **Phenotypic measurements**

Individuals in the Pima study were community residents  $\geq 15$  years old; individuals in the FIND study were urban Amerindians ( $\geq 50\%$  heritage by self-report) who were  $\geq 18$  years old. In both studies participants were included irrespective of health status. For the Pima study, we selected data from the time point from the last available examination prior to 2005 because the self-reported use of antilipidemic medication in this population was very limited (4.6% of subjects) during this time.<sup>1</sup> Use of antilipidemic medicines was also limited in the FIND participants (5.1% of subjects). Over 85% of those using antilipidemic medicines were taking statins; fibrate use was uncommon. Measurement methods of lipid levels were the same for both the Pima and FIND studies, and have been previously described.<sup>2</sup> Briefly, serum samples were collected 1–5 days before measurements. Total serum cholesterol was determined with a colorimetric method from 1965 to March 1992 and with an enzymatic method subsequently. Serum TG and HDL-C concentrations have been measured since 1993 by enzymatic methods. LDL-C was estimated with the Friedewald formula.<sup>3</sup> Hypertriglyceridemia was defined if TG was  $\geq 1.69$  mmol/L. In addition, measurements of 3 lipoprotein fractions (very low density lipoprotein cholesterol or VLDL-C, LDL-TG, and VLDL-TG) were available in a subset (n=206).<sup>4</sup>

In the Pima study, measurements of height and weight were performed by medically trained personnel to calculate body mass index (BMI). T2D was determined according to 1997 American Diabetes Association criteria based on results from an oral glucose tolerance test (or OGTT, i.e. fasting plasma glucose  $\geq 7.0$  mmol/l, 2-h plasma glucose concentration  $\geq 11.1$  mmol/l) or medical record reviews. In FIND participants, T2D was defined based on a previous medical

diagnosis, hemoglobin A<sub>1c</sub> ≥6.5% or fasting plasma glucose concentration ≥7.0 mmol/l (2010 American Diabetes Association criteria).

### **Genotypic data ascertainment**

Genotype data used in the linkage analysis (to calculate IBD sharing in the autosomal genome and to assess local IBD) were produced with the Affymetrix 6.0 Human SNP Array (Affymetrix, Santa Clara, CA) using the BIRDSEED algorithm, as described previously.<sup>5</sup> SNPs were excluded under any of 4 conditions: (1) >15% of missing genotype calls, (2) genotype frequencies diverged from Hardy-Weinberg expectations ( $P < 0.001$ ), (3) concordance among 100 duplicate samples <97%, or (4) the minor allele frequency (MAF) <5%. Genotyping of SNPs in both replication sets was performed by BeadXpress system (Illumina, San Diego, CA), Taqman genotyping assays (Applied Biosystems, Carlsbad, CA), KASP based assays (LGC, Middlesex, UK), or a custom SNP Array designed to capture common variants in the Pima Indian population (Affymetrix, Santa Clara, CA), all according to manufacturers' protocols. Genotype quality control required a call rate >95%, no deviation from HWE ( $P < 0.001$ ) and a discrepancy rate of <2.5% for blind duplicates (>100 for each sample set). Genotypes of all carriers of *APOC3* A43T were verified by direct sequencing.

### **Statistical analyses**

*Estimation of the percentage of alleles shared identical-by-descent matrix.* The execution of variance components linkage analysis of quantitative traits requires information on the alleles shared identical-by-descent (IBD) between 2 individuals. Traditionally, IBD was estimated between pairs of individuals in a pedigree based on self-reported relationships. In recent years, several new methods have been developed to estimate IBD more accurately using high-density genetic data, and these methods are applicable even in pairs of individuals without known relationships.<sup>6-9</sup> We used the program Beagle<sup>10</sup> and genetic maps from the Hapmap project

(<http://hapmap.ncbi.nlm.nih.gov/>, based on Phase II and Build 37 data) to carry out IBD estimation at each of ~400,000 SNPs in our dataset. The program Beagle takes the LD among variants into account for the IBD estimates. By using high-density genetic data (e.g. SNP data used for GWAS), probabilities for phased haplotypes are calculated and used as the basis to estimate IBD at any given locus. The average relatedness for any given pair was calculated as the genome-wide average of local IBD. As our Pima samples had the characteristics of a founder population, the recommended default setting for the scale parameter<sup>11</sup> was not optimal; thus we set the scale parameter at 10, which we determined by simulation to produce more accurate estimates for a sample of this size derived from a founder population. Beagle calculates the probability that a pair of individuals share  $\geq 1$  allele IBD at each SNP (*i.e.*, ignoring bilinear sharing); this value was converted to proportion IBD sharing by multiplying by  $\frac{1}{2}$ . For known full sibling pairs (who are the major pair type with bilinear sharing), the multiplication was by  $\frac{2}{3}$  instead of  $\frac{1}{2}$ , as given that they share  $\geq 1$  allele, they will on average share 1 allele  $\frac{2}{3}$  of the time and 2 alleles  $\frac{1}{3}$  of the time (*i.e.*, the expected proportion of alleles shared IBD conditional on sharing  $\geq 1$  allele =  $0.5 \cdot \frac{2}{3} + 1.0 \cdot \frac{1}{3} = \frac{2}{3}$ ).

*Genome-wide linkage analysis of 4 lipid traits.* Linkage analysis was conducted using the principles of the variance-components method developed by Amos.<sup>12</sup> Details of our approach have been described in detail previously.<sup>13-15</sup> Briefly, a linear mixed model is fitted to estimate fixed effects, representing the intercept and covariate effects, and three components of variance: an additive “monogenic” component ( $\sigma^2_M$ ) that estimates effects of a locus in the region of interest, a “polygenic” component ( $\sigma^2_G$ ) that incorporates overall relatedness, and an “environmental” component ( $\sigma^2_E$ ) that incorporates effects unique to the individual. Thus, the variance-covariance matrix for the trait ( $\Omega$ ) among all individuals in the sample is modeled as:

$$\Omega = \Pi\sigma^2_M + \Phi\sigma^2_G + I\sigma^2_E,$$

where  $\Pi$  is a matrix of the IBD estimates between pairs of individuals at the location of interest,  $\Phi$  is a matrix of the genome-wide average IBD, and  $I$  is an identity matrix. The null hypothesis of no linkage was assessed by comparing the full model to one in which the additive monogenic effect was constrained to 0, and the models were compared using a likelihood ratio test.<sup>16</sup> The logarithm of the odds score (LOD) for linkage was calculated by dividing the likelihood ratio test by  $2 \times \log_e(10)$ .

As the variance component analysis can be sensitive to departures from a normal distribution of the trait, all 4 lipid traits were normalized by inverse Gaussian transformation for the linkage analysis. The same analysis of the trait using its natural logarithm transformation did not substantially alter results. The model was fit with the “PROC MIXED” function of SAS (SAS Institute, Cary, NC). To estimate the power of this approach in the present sample, we conducted simulations in which trait data were generated under the assumption that a randomly selected SNP was a functional variant with a specified effect on the trait variance.

*Fine-mapping study –association analysis conditional on linkage effects.* We used the GWAS data from the Affymetrix 6.0 array and the WGS data of 296 Pima subjects as the reference panel to impute genotypes of all variants (both SNPs and insertion-deletion variants) not available from the Affymetrix 6.0 array. Imputation was performed with MINIMAC.<sup>17</sup> All directly genotyped variants and imputed variants (either nsSNP, with minor allele frequency (MAF)  $\geq 1\%$  or any other variant with MAF  $\geq 5\%$ ) with imputation  $r^2 > 0.3$  were analyzed for association. A total of 3,450 and 7,377 variants were analyzed for fine-mapping of the genome-wide significant TG and the HDL-C linkage locus, respectively. All analyses were conducted using SAS.

*Replication association analyses of TG.* The association between genotypes and TG was determined with linear regression modeling (additive model), where homozygotes for the major allele, heterozygotes, and homozygotes for the minor allele were coded to a numeric variable

for genotype (0, 1, and 2). To avoid the reduction in sample size resulting from missing data at multiple loci, we inferred missing genotypic data. To accomplish this, we calculated the probability of each of the 3 possible genotypes for each individual with missing data from the genotypes in the individual's relatives using MLINK,<sup>18</sup> and used these probabilities to construct the genotypic score. For the Pima sample, the model was fitted using a mixed model procedure to account for sibship. For the FIND sample, a linear regression model was used. To account further for cryptic relatedness in FIND (where family data are less extensive), the genomic control procedure was used, based on 42 randomly-selected SNPs.<sup>19</sup> Finally, meta-analysis for the Pima and FIND sample was conducted by the inverse variance method<sup>20</sup> to evaluate the association effects based on the largest sample. TG values were transformed by their natural logarithms (ln) to reduce skewness. We also included tag SNPs ( $r^2 > 0.8$ ) of variants found to have significant associations with TG in the fine-mapping study in the replication study. The tag SNPs and haploblocks (default definition) were identified using Haploview.<sup>21</sup>

*Correction for multiple testing in association analyses.* We corrected for multiple comparisons accounting for linkage disequilibrium among SNPs by calculating the effective number of independent comparisons as suggested by Moskva and Schmidt.<sup>22</sup> This method estimates the effective number of independent tests based on the pairwise correlation matrix between markers (i.e. the maximum absolute pairwise correlation between a given marker and all other markers in a defined window) and the desired overall type I error rate. By this method, for example, the 3,450 variants tested in the fine-mapping study of TG represented 718 effectively "independent" tests. In the replication study using the Pima sample, 11 variants tested were equivalent to 7.6 "independent" tests. Observed p values were corrected with a Bonferroni correction using this factor accordingly. All presented p values for the fine-mapping and replication studies are corrected p values.

*Haplotype construction and analyses.* Haplotype frequencies for pairs of variants were calculated in all Pima and FIND subjects with the Estimating Haplotypes (EH) program.<sup>23, 24</sup>  $D'$  was calculated as a measure of allelic association, and  $r^2$  as a measure of concordance. Association between traits and individual haplotypes were examined with a modification of the zero-recombinant haplotyping procedure.<sup>25</sup>

*Estimates of population admixture.* In the genome-wide and fine-mapping linkage studies, this estimate was calculated as the first principal component (PC1) in the principal component analysis of GWAS SNPs. For all samples used in the replication studies, as there were no SNP array data available, we typed 45 ancestry informative markers (AIMs) recommended by Tian et al.<sup>26</sup> The proportion of Amerindian heritage (% AI heritage) was estimated using a maximum likelihood method proposed by Hanis et al.<sup>27</sup> The correlation between PC1 and % AI heritage was high ( $r=0.87$ ). In other words, the population admixture estimate for each subject used in the linkage studies was done based on GWAS SNP data, and that used in the replication studies was obtained based on 45 AIMs.

*Covariates.* Covariates used in all models included age, sex, T2D status at the time of the lipid measurement, and population admixture estimates. Participants taking antilipidemic medicines were included in the analyses presented (without adjustment), but linkage and association analyses were repeated excluding those taking antilipidemic medicines with similar results.

## TABLE AND FIGURE LEGENDS

Table S1. Characteristics of 3 sets of study samples

Table S2. Maximum LOD from genome wide linkage studies of 4 serum lipid traits

Table S3. Results for 4 rounds of fine-mapping studies of 11 variants in 4,668 Pima Indians  
(Pima sample)

Table S4. The associations between rs147210663, rs964184, 3 APOA5 SNPs and triglycerides-related traits combining Pima and FIND sample

Figure S1. Empirically estimated IBD sharing by expected IBD sharing in the sample used for linkage analysis of serum lipids

Figure S2. Genome-wide linkage study results for 4 serum lipid traits

Figure S3. Genome-wide association study results for four serum lipid traits using the Affymetrix 6.0 array

Figure S4. Linkage disequilibrium pattern ( $r^2$ ) between 6 SNPs in 4,636 Pima samples

Figure S5. Raw levels of serum triglycerides by genotypes of 4 SNPs

Figure S6. rs964184 vs. APOA5 3-SNP haplotypes and frequencies

**Table S1. Characteristics of 3 sets of study samples****Pima Indian subjects (n = 1,024) used for genome-wide linkage analysis**

| <b>characteristics</b>     | <b>Men (n = 458, 44.7%)</b> | <b>Women (n = 566, 55.3%)</b> |
|----------------------------|-----------------------------|-------------------------------|
| Age (years)                | 41.1 ± 13.6                 | 42.9 ± 13.8                   |
| BMI (kg/m <sup>2</sup> )   | 34.0 ± 8.2                  | 36.9 ± 9.1                    |
| % T2D                      | 37.6%                       | 52.5%                         |
| Total cholesterol (mmol/L) | 4.76 ± 0.99                 | 4.69 ± 1.10                   |
| HDL cholesterol (mmol/L)   | 1.20 ± 0.41                 | 1.26 ± 0.37                   |
| LDL cholesterol (mmol/L)   | 2.79 ± 0.81                 | 2.63 ± 0.80                   |
| Triglycerides (mmol/L)     | 1.76 ± 1.48                 | 1.70 ± 1.21                   |

**Replication Set 1 - 5,491 additional Pima Indians (Pima sample)**

| <b>characteristics</b>     | <b>Men (n = 2,295, 41.8%)</b> | <b>Women (n = 3,196, 58.2%)</b> |
|----------------------------|-------------------------------|---------------------------------|
| Age                        | 34.8 ± 14.5                   | 36.9 ± 15.4                     |
| BMI                        | 33.3 ± 8.0                    | 35.5 ± 8.8                      |
| % T2D                      | 31.6%                         | 39.1%                           |
| % Amerindian heritage      | 0.88 ± 0.16                   | 0.90 ± 0.14                     |
| Total cholesterol (mmol/L) | 4.69 ± 1.02                   | 4.51 ± 0.98                     |
| HDL cholesterol (mmol/L)   | 1.16 ± 0.37                   | 1.23 ± 0.35                     |
| LDL cholesterol (mmol/L)   | 2.79 ± 0.84                   | 2.58 ± 0.77                     |
| Triglycerides (mmol/L)     | 1.67 ± 1.47                   | 1.51 ± 1.09                     |
| Hypertriglyceridemia*      | 34.7%                         | 30.6%                           |

**Replication Set 2 - 3,189 southwestern Native Americans (FIND sample)**

| <b>characteristics</b>     | <b>Men (n = 1,576, 49.4%)</b> | <b>Women (n = 1,613, 50.6%)</b> |
|----------------------------|-------------------------------|---------------------------------|
| Age                        | 36.5 ± 12.4                   | 36.7 ± 13.3                     |
| BMI                        | 30.1 ± 6.5                    | 32.8 ± 7.8                      |
| % T2D                      | 24.2%                         | 31.6%                           |
| % Amerindian heritage      | 0.80 ± 0.16                   | 0.81 ± 0.16                     |
| Total cholesterol (mmol/L) | 4.73 ± 1.07                   | 4.50 ± 1.09                     |
| HDL cholesterol (mmol/L)   | 1.30 ± 0.45                   | 1.25 ± 0.37                     |
| LDL cholesterol (mmol/L)   | 2.68 ± 0.80                   | 2.49 ± 0.75                     |
| Triglycerides (mmol/L)     | 1.69 ± 1.31                   | 1.61 ± 1.79                     |
| Hypertriglyceridemia*      | 36.0%                         | 32.1%                           |

\* Hypertriglyceridemia was defined as having a serum triglyceride levels ≥ 1.69 mmol/L.



**Table S2. Maximum LOD from genome wide linkage studies of 4 serum lipid traits\***

| <b>Trait</b>      | <b>Total heritability</b> | <b>n</b> | <b>Chromosome</b> | <b>LOD</b> | <b>p</b>              | <b>variance explained</b> |
|-------------------|---------------------------|----------|-------------------|------------|-----------------------|---------------------------|
| Total cholesterol | 48%                       | 1,023    | 15q               | 2.75       | $1.8 \times 10^{-4}$  | 7.7%                      |
| Triglycerides     | 36%                       | 1,007    | 11q               | 9.23       | $3.5 \times 10^{-11}$ | 10.6%                     |
| HDL-cholesterol   | 37%                       | 1,024    | 1p                | 3.77       | $1.5 \times 10^{-5}$  | 7.5%                      |
| LDL-cholesterol   | 51%                       | 970      | 15q               | 2.12       | $8.9 \times 10^{-4}$  | 6.8%                      |

\* The distributions of all 4 traits were normalized for the linkage analyses.

**Table S3. Results for 4 rounds of fine-mapping studies of 11 variants in 4,668 Pima Indians (Pima sample)**

| rs number   | Position* | Gene         | Variant type        | Reason for testing                                        | p <sup>†</sup> from Round 1 analysis | p <sup>†</sup> from Round 2 analysis | p <sup>†</sup> from Round 3 analysis | p <sup>†</sup> from Round 4 analysis |
|-------------|-----------|--------------|---------------------|-----------------------------------------------------------|--------------------------------------|--------------------------------------|--------------------------------------|--------------------------------------|
| rs2075295   | 116628401 | <i>BUD13</i> | Intronic            | Tag SNP for rs2072560                                     | $2.5 \times 10^{-8}$                 | $8.8 \times 10^{-6}$                 | 0.091                                | 1.00                                 |
| rs3825041   | 116631707 | <i>BUD13</i> | Intronic            | Tag SNP for rs2072560                                     | $1.4 \times 10^{-16}$                | $1.4 \times 10^{-13}$                | 0.004                                | 1.00                                 |
| rs964184    | 116648917 | <i>ZPR1</i>  | Near 3' UTR         | GWAS SNP                                                  | $5.4 \times 10^{-30}$                | $2.1 \times 10^{-22\ddagger}$        | covariate                            | covariate                            |
| rs2072560   | 116661826 | <i>APOA5</i> | Intronic            | The 2 <sup>nd</sup> strongest SNP from find-mapping study | $2.9 \times 10^{-8}$                 | $9.5 \times 10^{-7}$                 | 0.100                                | 1.00                                 |
| rs3135506   | 116662407 | <i>APOA5</i> | Missense SNP, S19W  | GWAS SNP                                                  | $4.6 \times 10^{-6}$                 | $4.1 \times 10^{-4}$                 | 0.041                                | 1.00                                 |
| rs651821    | 116662579 | <i>APOA5</i> | 5' UTR              | Tag SNP for rs2072560 and a GWAS SNP                      | $1.2 \times 10^{-17}$                | $1.5 \times 10^{-14}$                | 0.0012 <sup>‡</sup>                  | covariate                            |
| rs662799    | 116663707 | <i>APOA5</i> | Promoter            | GWAS SNP                                                  | $1.9 \times 10^{-17}$                | $6.6 \times 10^{-14}$                | 0.027                                | 1.00                                 |
| rs147210663 | 116701560 | <i>APOC3</i> | Missense SNP, A43T  | The strongest SNP from find-mapping study                 | $7.4 \times 10^{-48\ddagger}$        | covariate                            | covariate                            | covariate                            |
| rs12225230  | 116728630 | <i>SIK3</i>  | Missense SNP, P917R | GWAS SNP                                                  | $3.1 \times 10^{-6}$                 | $4.4 \times 10^{-4}$                 | 0.63                                 | 1.00                                 |
| rs11357208  | 116784304 | <i>SIK3</i>  | Indel, Intronic     | The 3 <sup>rd</sup> strongest SNP from find-mapping study | $1.2 \times 10^{-6}$                 | $1.8 \times 10^{-4}$                 | 0.79                                 | 1.00                                 |
| rs139961185 | 116807343 | <i>SIK3</i>  | Intronic            | GWAS SNP                                                  | $2.6 \times 10^{-9}$                 | $1.1 \times 10^{-7}$                 | 1.00                                 | 1.00                                 |

\* Build 37 position on chromosome 11.

† Corrected for multiple testing.

‡ The SNP with the strongest p value in a given round of analysis.

**Table S4. The associations between rs147210663, rs964184, 3 APOA5 SNPs and triglycerides-related traits combining Pima and FIND samples**

**A. Results for quantitative traits**

| Trait               | SNP                     | n     | $\beta \pm \text{s.e}$ | variance explained | p                     |
|---------------------|-------------------------|-------|------------------------|--------------------|-----------------------|
| Ln(triglycerides)   | rs147210663             | 7,297 | -0.922 ± 0.059         | 3.53%              | $9.7 \times 10^{-55}$ |
|                     | rs964184                | 7,057 | 0.208 ± 0.017          | 2.26%              | $8.6 \times 10^{-33}$ |
|                     | APOA5 SNPs <sup>†</sup> | 6,487 | 0.142 ± 0.012          | 2.41%              | $1.2 \times 10^{-31}$ |
| Total cholesterol   | rs147210663             | 8,413 | -0.265 ± 0.058         | 0.23%              | $4.7 \times 10^{-6}$  |
|                     | rs964184                | 8,153 | 0.101 ± 0.017          | 0.47%              | $4.5 \times 10^{-9}$  |
|                     | APOA5 SNPs              | 7,500 | 0.065 ± 0.012          | 0.45%              | $6.7 \times 10^{-8}$  |
| HDL cholesterol     | rs147210663             | 8,414 | 0.437 ± 0.059          | 0.67%              | $9.2 \times 10^{-14}$ |
|                     | rs964184                | 8,154 | -0.085 ± 0.018         | 0.28%              | $1.6 \times 10^{-6}$  |
|                     | APOA5 SNPs              | 7,501 | -0.045 ± 0.012         | 0.18%              | $3.7 \times 10^{-4}$  |
| LDL cholesterol     | rs147210663             | 7,822 | -0.089 ± 0.055         | 0.01%              | 0.101                 |
|                     | rs964184                | 7,734 | 0.052 ± 0.021          | 0.15%              | 0.013                 |
|                     | APOA5 SNPs              | 7,089 | 0.030 ± 0.011          | 0.13%              | 0.006                 |
| VLDL-C <sup>‡</sup> | rs147210663             | 206   | -1.11 ± 0.240          | 10.2%              | $3.9 \times 10^{-6}$  |
|                     | rs964184                | 206   | 0.29 ± 0.095           | 1.67%              | 0.0022                |
|                     | APOA5 SNPs              | 191   | 0.21 ± 0.069           | 3.46%              | 0.0019                |
| VLDL–triglycerides  | rs147210663             | 206   | -1.26 ± 0.231          | 14.5%              | $5.6 \times 10^{-8}$  |
|                     | rs964184                | 206   | 0.42 ± 0.092           | 7.17%              | $3.8 \times 10^{-6}$  |
|                     | APOA5 SNPs              | 191   | 0.34 ± 0.067           | 9.57%              | $5.0 \times 10^{-7}$  |
| LDL–triglycerides   | rs147210663             | 206   | -0.019 ± 0.0051        | 7.20%              | 0.00017               |
|                     | rs964184                | 206   | 0.0071 ± 0.0019        | 6.04%              | $3.8 \times 10^{-6}$  |
|                     | APOA5 SNPs              | 191   | 0.0060 ± 0.0014        | 8.43%              | $1.6 \times 10^{-5}$  |

**B. Results for a qualitative trait**

| Trait                             | SNP         | n     | OR <sup>§</sup> (95% CI) | p                     |
|-----------------------------------|-------------|-------|--------------------------|-----------------------|
| Hypertriglyceridemia <sup>¶</sup> | rs147210663 | 8,039 | 0.14 (0.09, 0.22)        | $4.5 \times 10^{-18}$ |
|                                   | rs964184    | 7,945 | 1.53 (1.42, 1.65)        | $5.0 \times 10^{-31}$ |
|                                   | APOA5 SNPs  | 7,281 | 1.32 (1.25, 1.39)        | $2.0 \times 10^{-27}$ |

\* Based on an additive genetic model, for the effect of the minor allele, in SD unit.

† Effects expressed per copy of any minor allele of these 3 functional SNPs in APOA5:

rs2266788, rs3135506, rs662799.

‡ Very low density lipoprotein cholesterol.

§ OR = odds ratio.

¶ Hypertriglyceridemia defined as having serum triglyceride levels  $\geq 1.69$  mmol/L.

**Figure S1. Empirically estimated IBD sharing by expected IBD sharing in the sample used for linkage analysis of serum lipids**

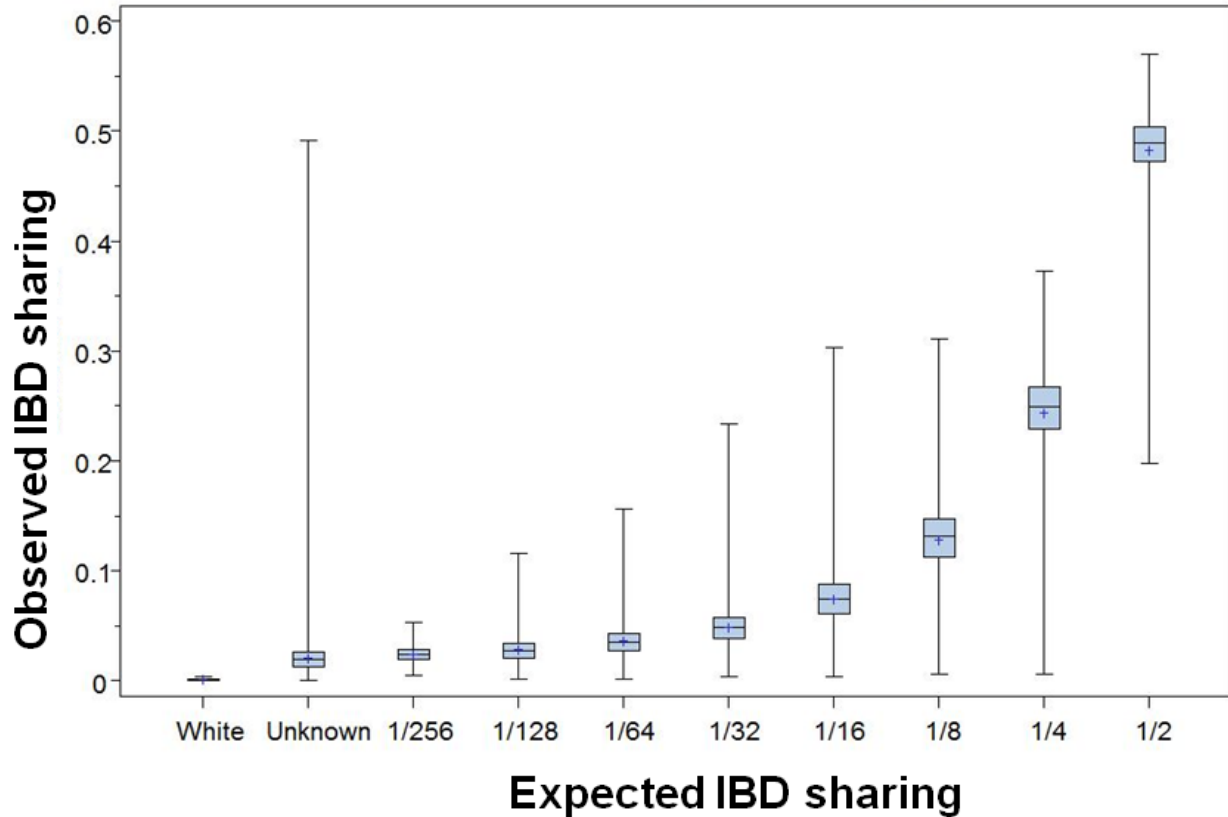

IBD sharing refers to the percentage of allele shared identical by decent. N = 1,024 subjects, or 523,776 pairs; 9,664 pairs (1.8%) with known relationship. 98.2% pairs had no known relationship. Data are shown as a box plot, with the error bars representing the range, the thicker bars representing the 25<sup>th</sup> and 75<sup>th</sup> centiles, the horizontal bar representing the median and the + sign representing the mean. IBD sharing estimates for whites (19 individuals) were calculated with ibdscale = 1 (which was determined to give comparable estimates in 19 Pimas to those obtained in the larger set of 1,024 Pimas).

Figure S2. Genome-wide linkage study results for 4 serum lipid traits

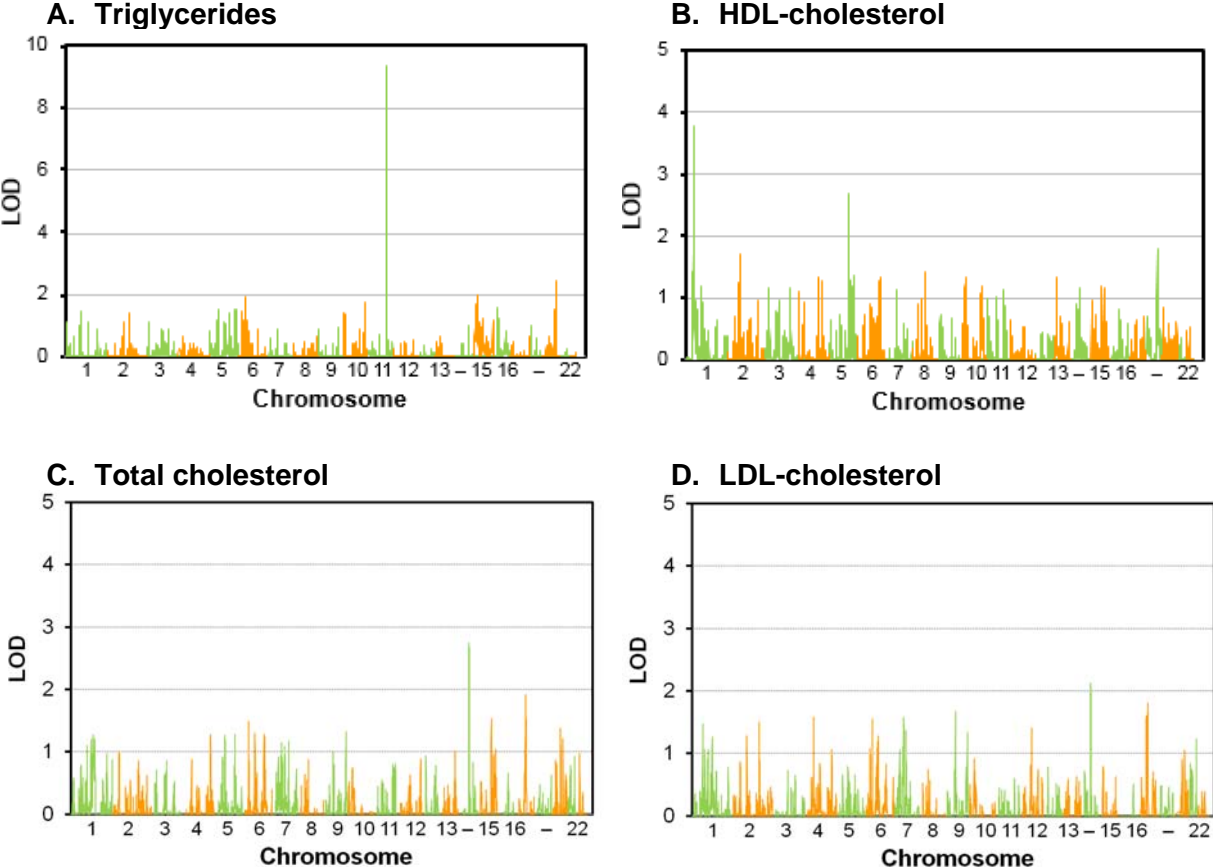

**Figure S3. Genome-wide association study results for four serum lipid traits using the Affymetrix 6.0 array**

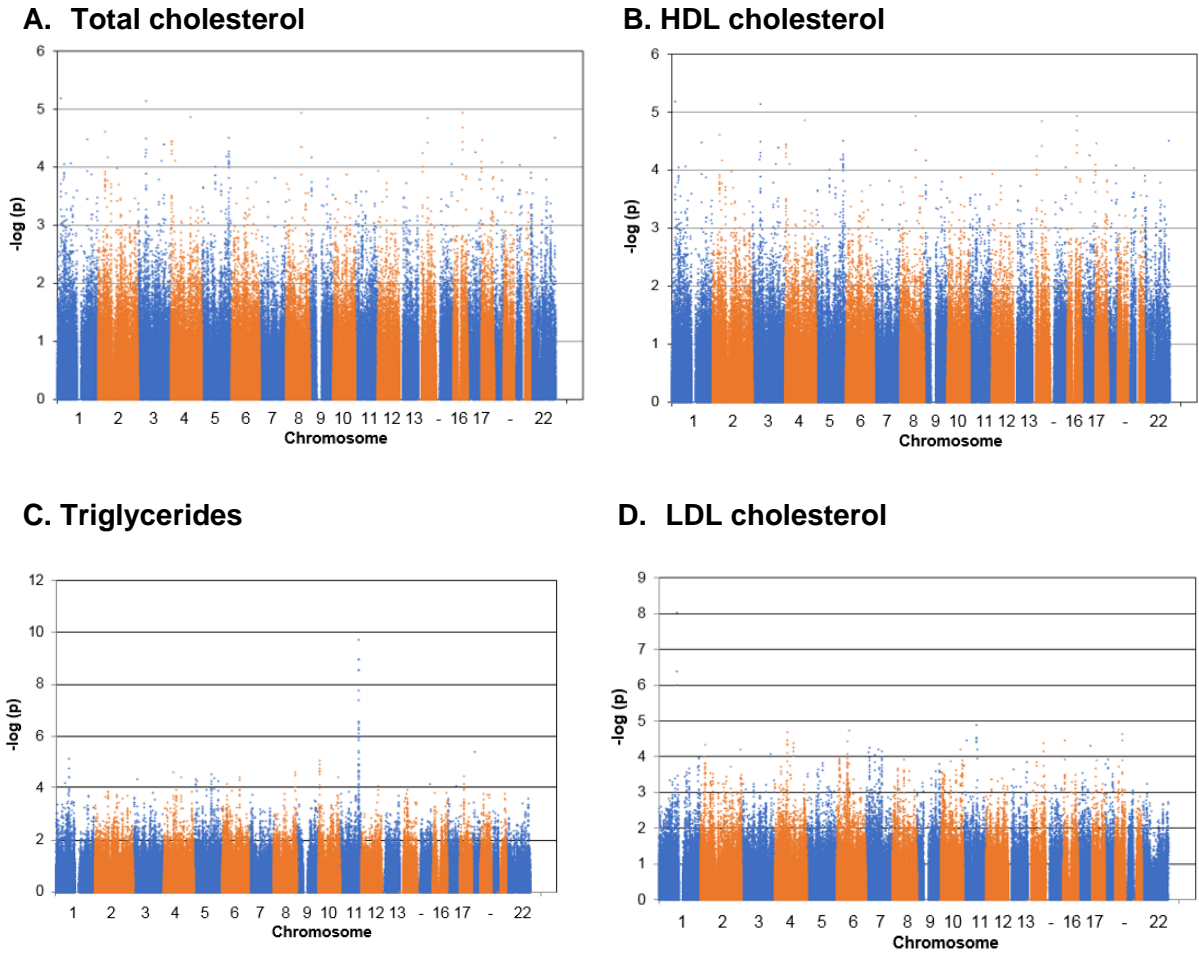

Figure S4. Linkage disequilibrium pattern ( $r^2$ ) between 6 SNPs in 4,636 Pima samples

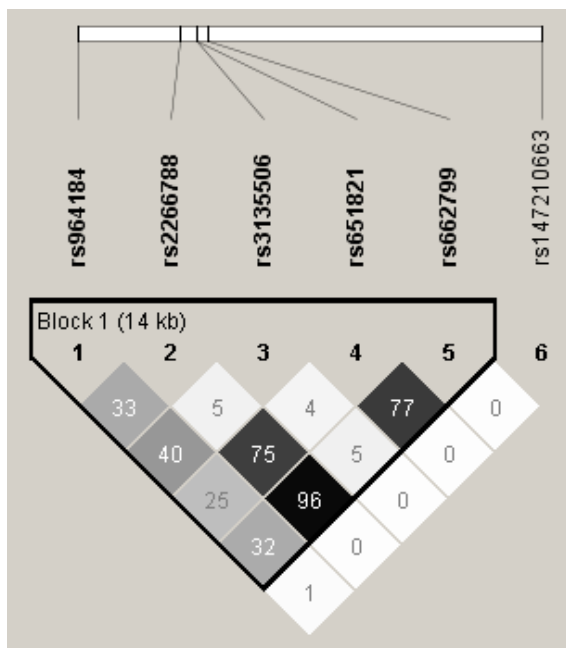

Figure S5. Raw levels of serum triglycerides by genotypes of 4 SNPs in Pima Indians

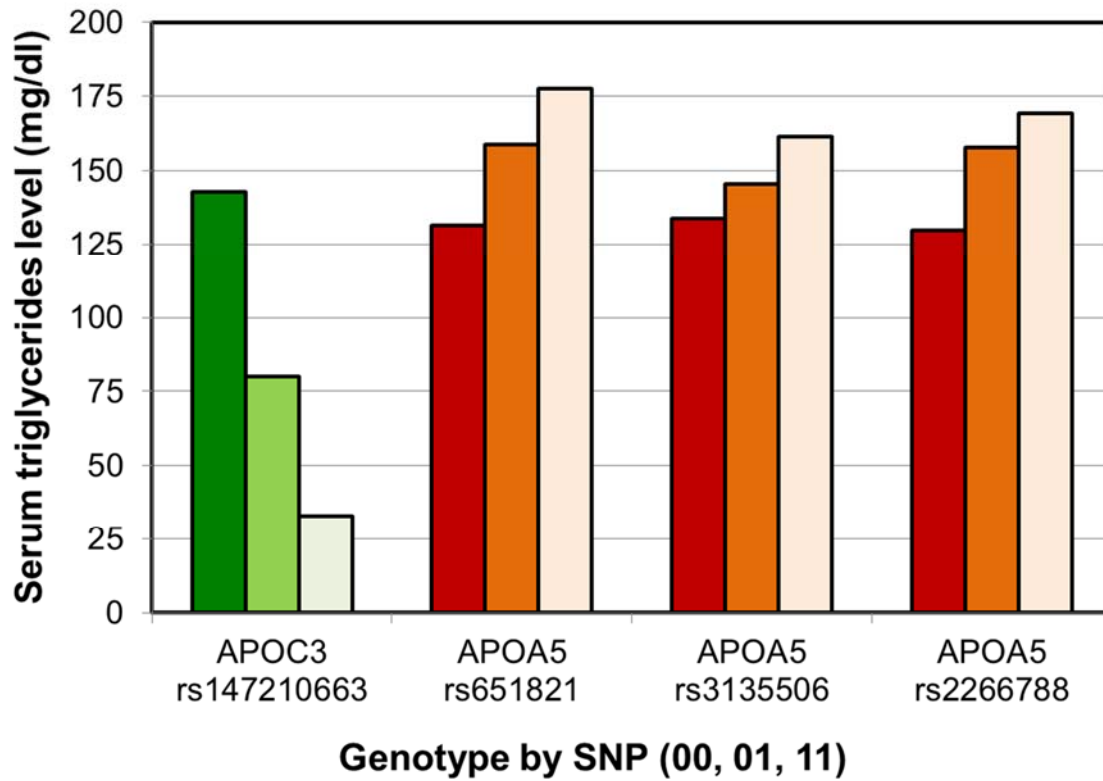

Bars of a dark color represent mean levels of plasma triglycerides among homozygotes of the major allele (genotype 00); bars of an intermediate color represent mean levels of serum triglycerides among heterozygotes of the major allele (genotype 01); and bars of a light color represent mean levels of serum triglycerides among homozygotes of the minor allele (genotype 11).



**Figure S6. rs964184 vs. APOA5 3-SNP haplotypes and frequencies**

| <b>rs964184</b> | <b>rs2266788</b> | <b>rs3135506</b> | <b>rs651821</b> | <b>rs6622799</b> | <b>Frequency</b> |
|-----------------|------------------|------------------|-----------------|------------------|------------------|
| <b>G</b>        | <b>T</b>         | <b>S</b>         | <b>T</b>        | <b>A</b>         | <b>60.6%</b>     |
| <b>C</b>        | <b>T</b>         | <b>W</b>         | <b>T</b>        | <b>A</b>         | <b>20.8%</b>     |
| <b>C</b>        | <b>C</b>         | <b>S</b>         | <b>C</b>        | <b>G</b>         | <b>14.0%</b>     |
| <b>C</b>        | <b>C</b>         | <b>S</b>         | <b>T</b>        | <b>G</b>         | <b>3.3%</b>      |

These results were calculated in the Pima sample (n = 4,636).

## Supplemental References

1. Looker HC, Krakoff J, Andre V, Kobus K, Nelson RG, Knowler WC, et al. Secular trends in treatment and control of type 2 diabetes in an American Indian population: a 30-year longitudinal study. *Diabetes Care*. 2010;33:2383-9.
2. Imperatore G, Knowler WC, Pettitt DJ, Kobes S, Fuller JH, Bennett PH, et al. A locus influencing total serum cholesterol on chromosome 19p: results from an autosomal genomic scan of serum lipid concentrations in Pima Indians. *Arteriosclerosis, thrombosis, and vascular biology*. 2000;20:2651-6.
3. Friedewald WT, Levy RI and Fredrickson DS. Estimation of the concentration of low-density lipoprotein cholesterol in plasma, without use of the preparative ultracentrifuge. *Clin Chem*. 1972;18:499-502.
4. Fagot-Campagna A, Narayan KM, Hanson RL, Imperatore G, Howard BV, Nelson RG, et al. Plasma lipoproteins and incidence of non-insulin-dependent diabetes mellitus in Pima Indians: protective effect of HDL cholesterol in women. *Atherosclerosis*. 1997;128:113-9.
5. Malhotra A, Kobes S, Knowler WC, Baier LJ, Bogardus C and Hanson RL. A genome-wide association study of BMI in American Indians. *Obesity (Silver Spring)*. 2011;19:2102-6.
6. Browning BL and Browning SR. A unified approach to genotype imputation and haplotype-phase inference for large data sets of trios and unrelated individuals. *Am J Hum Genet*. 2009;84:210-23.
7. Bercovici S, Meek C, Wexler Y and Geiger D. Estimating genome-wide IBD sharing from SNP data via an efficient hidden Markov model of LD with application to gene mapping. *Bioinformatics*. 2010;26:i175-82.
8. Han L and Abney M. Using identity by descent estimation with dense genotype data to detect positive selection. *Eur J Hum Genet*. 2013;21:205-11.

9. Purcell S, Neale B, Todd-Brown K, Thomas L, Ferreira MA, Bender D, et al. PLINK: a tool set for whole-genome association and population-based linkage analyses. *Am J Hum Genet.* 2007;81:559-75.
10. Browning SR and Browning BL. High-resolution detection of identity by descent in unrelated individuals. *Am J Hum Genet.* 2010;86:526-39.
11. Browning BL and Browning SR. Improving the accuracy and efficiency of identity-by-descent detection in population data. *Genetics.* 2013;194:459-71.
12. Amos CI. Robust variance-components approach for assessing genetic linkage in pedigrees. *Am J Hum Genet.* 1994;54:535-543.
13. Hanson RL, Ehm MG, Pettitt DJ, Prochazka M, Thompson DB, Timberlake D, et al. An autosomal genomic scan for loci linked to type II diabetes mellitus and body-mass index in Pima Indians. *Am J Hum Genet.* 1998;63:1130-1138.
14. Pratley RE, Thompson DB, Prochazka M, Baier L, Mott D, Ravussin E, et al. An autosomal genomic scan for loci linked to prediabetic phenotypes in Pima Indians. *J Clin Invest.* 1998;101:1757-1764.
15. Hanson RL and Knowler WC. Quantitative trait linkage studies of diabetes-related traits. *Curr Diab Rep.* 2003;3:176-83.
16. Hopper JL and Mathews JD. Extensions to multivariate normal models for pedigree analysis. *Ann Hum Genet.* 1982;46 (4):373-383.
17. Fuchsberger C, Abecasis GR and Hinds DA. minimac2: faster genotype imputation. *Bioinformatics.* 2015;31:782-4.
18. Lathrop GM and Lalouel JM. Easy calculations of lod scores and genetic risks on small computers. *Am J Hum Genet.* 1984;36:460-5.
19. Devlin B, Roeder K and Bacanu SA. Unbiased methods for population-based association studies. *Genet Epidemiol.* 2001;21:273-84.

20. Petitti DB. Decision analysis and cost-effectiveness analysis: methods for quantitative synthesis in medicine. In: D. B. Petitti, ed. *Meta-Analysis* Oxford, UK: Oxford University Press; 2000: 94-118.
21. de Bakker PI, Yelensky R, Pe'er I, Gabriel SB, Daly MJ and Altshuler D. Efficiency and power in genetic association studies. *Nat Genet.* 2005;37:1217-23.
22. Moskvina V and Schmidt KM. On multiple-testing correction in genome-wide association studies. *Genet Epidemiol.* 2008;32:567-73.
23. Ott J. *Analysis of human genetic linkage*. Revised ed. Baltimore: Johns Hopkins University Press; 1991.
24. Terwilliger JDaO, J. Linkage disequilibrium between alleles at marker loci *Handbook of Human Genetic Linkage*; 1994.
25. Vozarova de Courten B, Hanson RL, Funahashi T, Lindsay RS, Matsuzawa Y, Tanaka S, et al. Common polymorphisms in the adiponectin gene ACDC are not associated with diabetes in Pima Indians. *Diabetes.* 2005;54:284-9.
26. Tian C, Hinds DA, Shigeta R, Adler SG, Lee A, Pahl MV, et al. A genomewide single-nucleotide-polymorphism panel for Mexican American admixture mapping. *Am J Hum Genet.* 2007;80:1014-23.
27. Hanis CL, Chakraborty R, Ferrell RE and Schull WJ. Individual admixture estimates: disease associations and individual risk of diabetes and gallbladder disease among Mexican-Americans in Starr County, Texas. *Am J Phys Anthropol.* 1986;70:433-41.
